# Supplementary material for: Looking Behind the Curtain: Identifying Factors Contributing to Changes on Care Outcomes During a Large Commercial EHR Implementation
Source: PubMed Central journal article supplement (PMC6509951; doi:10.5334/egems.269), 2019-05-06
Supplement: egems-7-1-269-s2.pdf [file egems-7-1-269-s2.pdf]

**Table S1. Interview script**

| Interview phase                                                                                                                                                                                     | Questions asked                                                                                                                                                                                                                                                                                                                                                                                                |
|-----------------------------------------------------------------------------------------------------------------------------------------------------------------------------------------------------|----------------------------------------------------------------------------------------------------------------------------------------------------------------------------------------------------------------------------------------------------------------------------------------------------------------------------------------------------------------------------------------------------------------|
| <p>Questions about perceptions of the performance changes detected and identification of complementary factors that could have caused those changes</p>                                             | <p>a. During the new EHR go live, did you notice the performance change(s) on the outcomes presented here?</p> <p>b. What other changes to processes, procedures, resources, and assets were introduced during the implementation of the new EHR?</p> <p>c. Do you believe these changes are associated with the outcome(s) here presented? If so, how did the change(s) impact the outcome and your work?</p> |
| <p>Questions about the time when these factors were introduced</p>                                                                                                                                  | <p>a. Please describe how you were informed about and prepared for the changes previously discussed?</p> <p>b. When these changes were introduced (before, after go live)?</p> <p>c. Are they still impacting your work? How?</p>                                                                                                                                                                              |
| <p>Questions to understand how these factors affected the study outcomes</p>                                                                                                                        | <p>a. Please tell me about any strategies implemented by the IH leadership to mitigate/maximize the impact introduced by the implementation or by the changes previously discussed?</p> <p>b. Were they effective?</p> <p>c. Do you believe that lack of training and/or go live support could have contributed to these changes and impacted the outcomes?</p>                                                |
| <p>'What-if' queries: questions to identify confounders that could be measured with data available in electronic format in future evaluations to monitor the factors elicited by the interviews</p> | <p>a) Are there any other process or outcome with data available in electronic format that could be measured as a confounder (potential alternative explanation to the impact observed) for monitoring the changes previously discussed?</p> <p>b) Other what-if queries were identified during the interviews based on the complementary factors described by interviewee.</p>                                |

Source: Interview script.
